# Supplementary material
Source: publisher figshare collection journal article supplement (https://aacr.figshare.com/ndownloader/files/39829850)
Supplement: Supplementary file 1 [file 39829850]

## Giannoni E. et al. Supplementary Figure 1

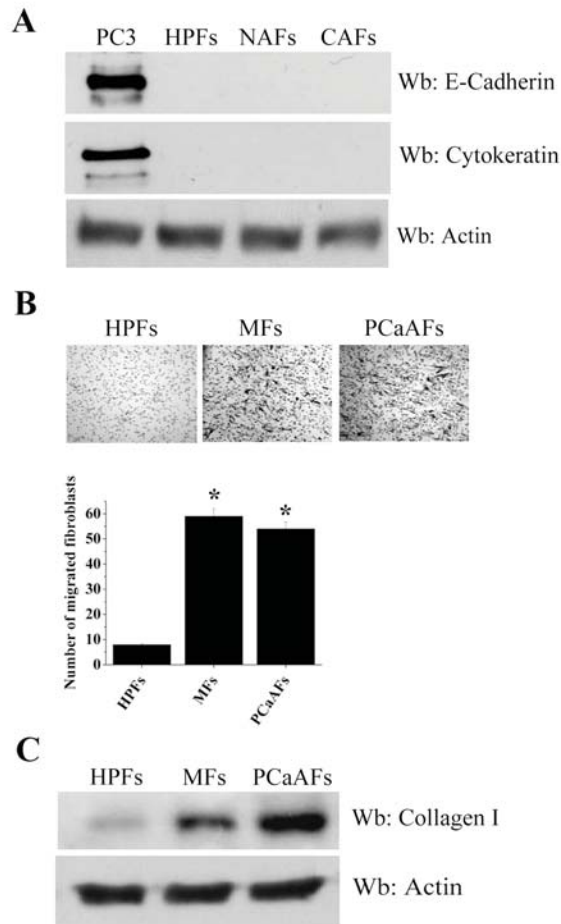

**Supplementary FIG.1. Characterization of organ-specific human prostate fibroblasts.** **A.** Fibroblasts isolated from patients affected by benign prostatic hyperplasia (HPFs) or from healthy and cancer regions of PCa-bearing patients (NAFs and CAFs, respectively) were analyzed by immunoblotting for the expression of the epithelial markers E-cadherin and cytokeratin. **B.** Sub-confluent HPFs were activated for 24 h with 10 ng/ml TGF- $\beta$ 1 (MFs) or CM<sup>PC3</sup> (PCaAFs) and then serum-starved for additional 24 h.  $1 \times 10^4$  cells were plated in 200  $\mu$ l serum-free medium in the upper chamber (without Matrigel coating) and complete growth medium was used as chemoattractant in the lower reservoir. Photographs were taken and a representative image of each sample was shown. Photographs and bar graph, representative of six randomly chosen fields, are shown. \* $p < 0.001$  vs. HPFs. **C.** HPFs were activated as in B and analyzed for the expression of Collagen I. Results are representative of three others with similar results.

## Giannoni E. et al. Supplementary Figure 2

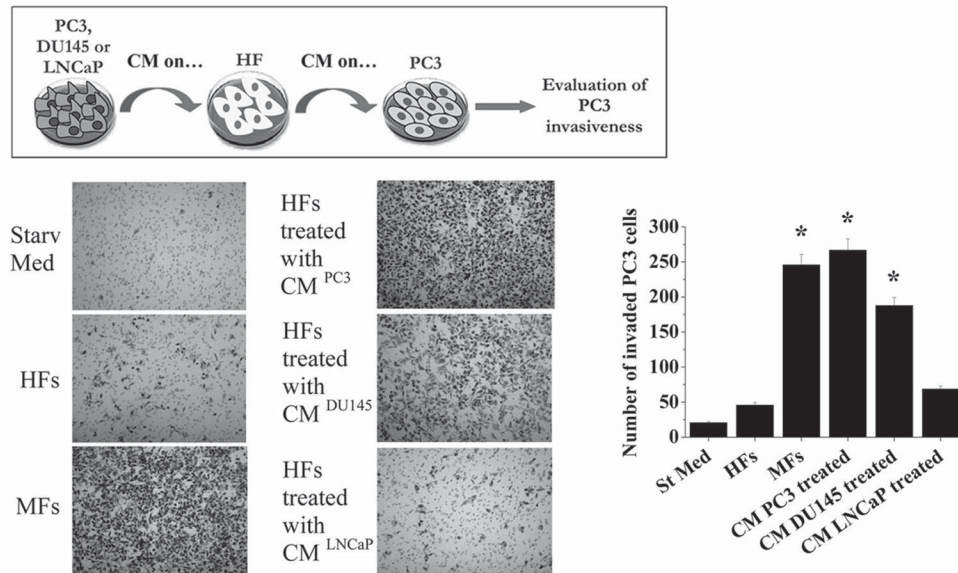

**Supplementary Fig.2. PC3 and DU145, but not LNCaP, have the ability to stimulate fibroblast activation and to increase PC3 invasiveness.** HF were incubated with CM obtained from PC3, DU145 or LNCaP for 24 h and then with serum-free medium for additional 24 h. CM from the differently treated-fibroblasts were collected and used to treat PC3 cells in a Boyden invasion assay. After 24 h,  $5 \times 10^4$  PC3 cells for each treatment were allowed to invade for 24 h as described in E. Photographs are representative of randomly chosen fields. The bar graph represents the number of invaded cells shown in five different fields of triplicate experiments. \* $p < 0.001$  vs. St Med. Results are representative of three experiments with similar results.

# Giannoni E. et al. Supplementary Figure 3

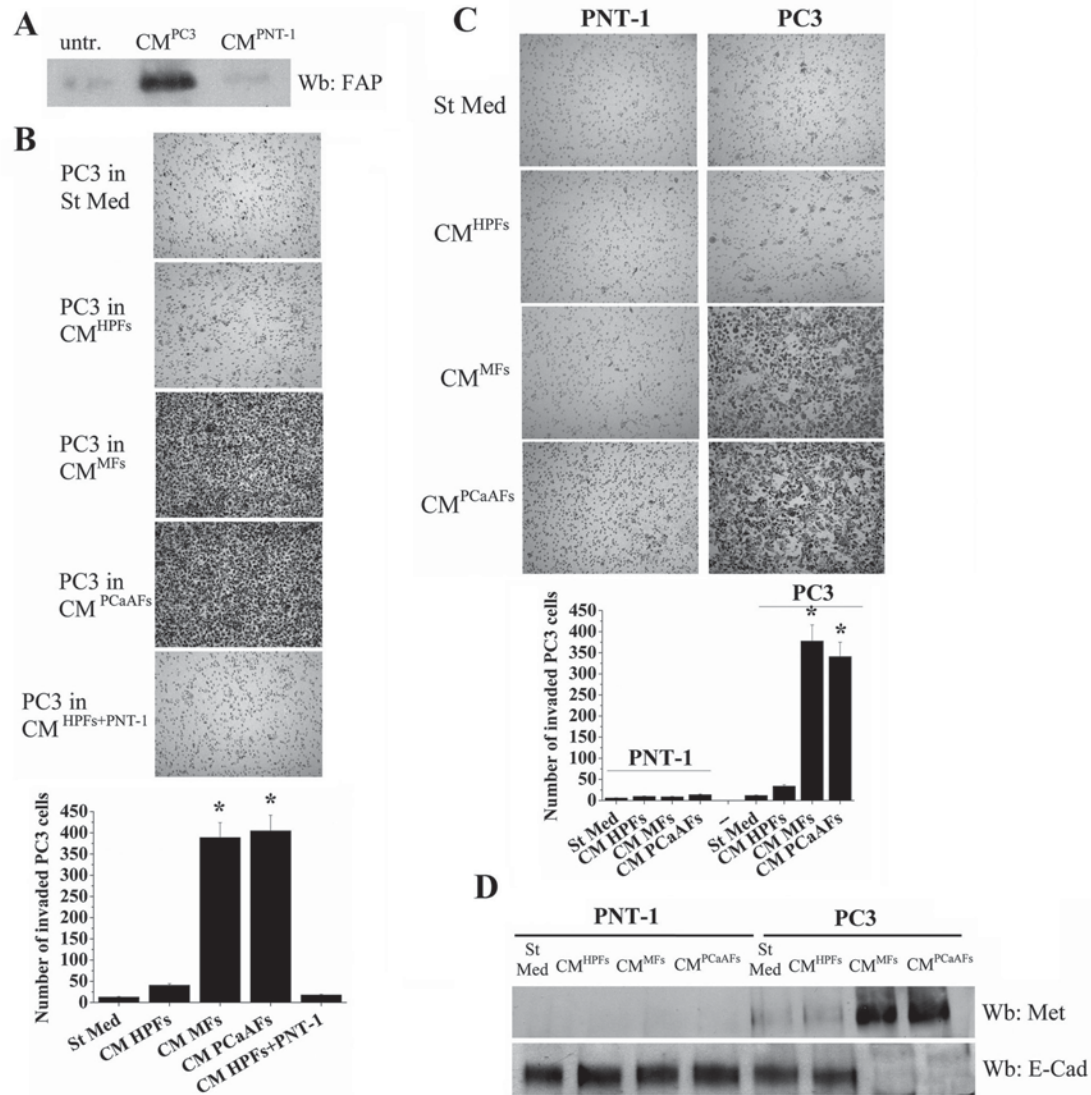

**Supplementary Fig.3. Non-transformed prostate epithelial cells are unable to promote fibroblast activation and are insensitive to CAFs.** **A.** Sub-confluent HPFs were left untreated or activated for 24 h with CM<sup>PC3</sup> (PCaAF) or CM<sup>PNT-1</sup> and then serum-starved for additional 24h. Expression of FAP protein was assessed by immunoblot. **B.** PC3 cells were incubated with CM from HPFs, MFs, PCaAFs and HPFs treated with CM<sup>PNT-1</sup> or serum-starved as a control. After 24 h, CM were replaced with serum-free medium and incubate for additional 24 h. 5x10<sup>4</sup> PC3 cells for each treatment were allowed to migrate for 24 h (in the presence of Matrigel coating) toward complete growth medium as chemoattractant. **C.** PC3 and PNT-1 cells were incubated with CM from HPFs, MFs and PCaAFs or serum-starved as a control. After 24 h, CM were replaced with serum-free medium and incubate for additional 24 h. An invasion assay was performed as described in B. In both B and C, photographs are representative of several randomly chosen fields and the histograms represent the number of invaded cells shown in five different fields of triplicate experiments. \*p < 0.001 vs. St Med. **D.** 5x10<sup>5</sup> PC3 or PNT-1 cells were incubated for 48 h with CM from HPFs, MFs and PCaAFs or serum-starved as a control. CM were then removed and serum-free medium was added for additional 24 h. After the 72 h-total incubation period, cells were lysed and an anti-Met and an anti-E-Cad immunoblots were performed. All the experiments are representative of three others with similar results.

## Giannoni E. et al. Supplementary Figure 4

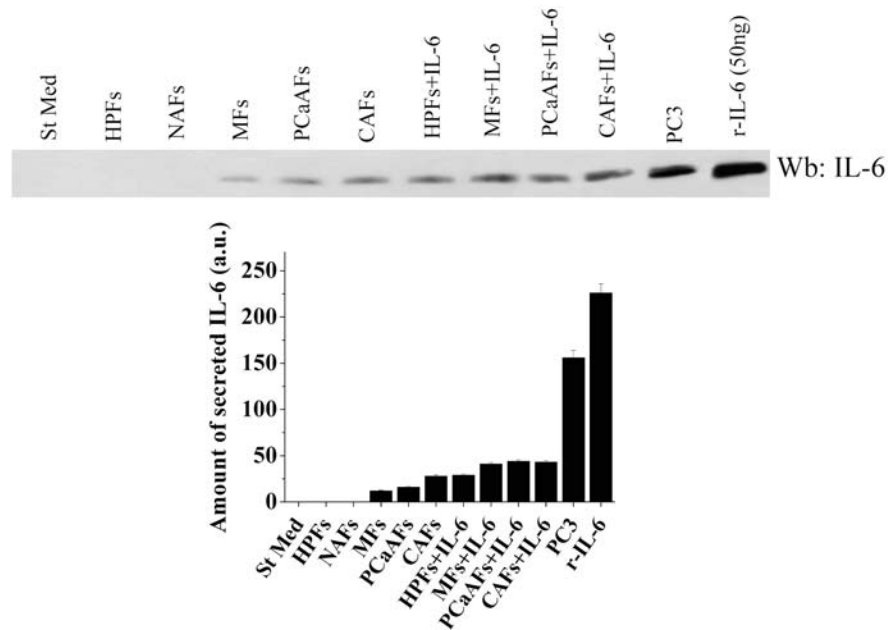

**Supplementary FIG.4. Evaluation of the amount of IL-6 in CM derived from *in vitro* and *in vivo* activated fibroblasts and PC3 cells.** IL-6 was evaluated by immunoblotting on CM of PC3 cells, of resting fibroblasts (HPFs and NAFs), as well as on CM of HPFs activated for 24 h with 10 ng/ml TGF- $\beta$ 1 (MFs), CM<sup>PC3</sup> (PCa-AFs) or 50 ng/ml IL-6 (HPFs+IL-6). In addition, MFs, PCaAFs and CAFs were further treated with 50 ng/ml IL-6 to analyze a further increase in the levels of secreted IL-6. In all the treatments, fresh serum-free medium was added for additional 24 h before collection of CM. Results are representative of three others with similar results.

## Giannoni E. et al. Supplementary Figure 5

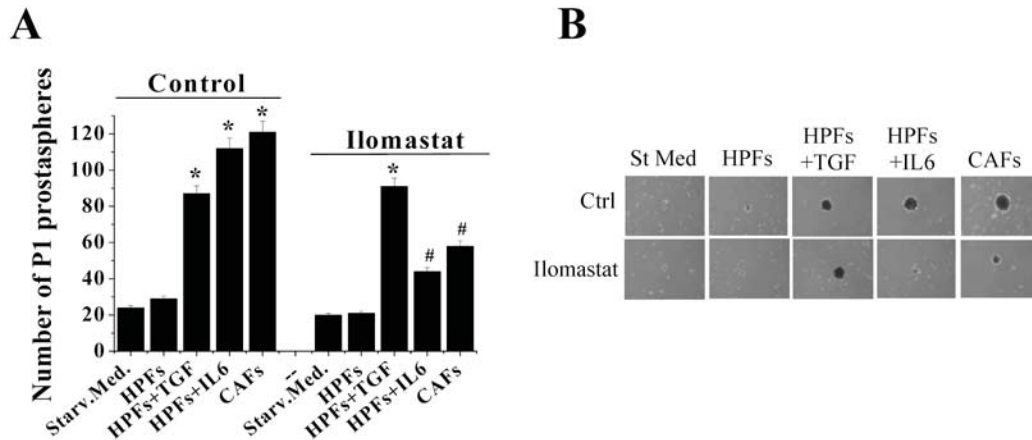

**Supplementary FIG.5. MMPs are instrumental for CAF-induced cancer cell stemness.** PC3 cells were incubated with CM from HPFs, HPFs stimulated with 10 ng/ml TGF- $\beta$ 1 or 50 ng/ml IL-6, CAFs or serum-starved as control. After 24 h, CM were replaced with serum-free medium and incubated for additional 24 h. PC3 cells were allowed to form P0 spheres and individual spheres were dissociated and diluted in 96-well plate (1 cell/well). After 15-20 days the new P1 spheres were counted and plotted. \* $p < 0.001$  vs. starv. med. # $p < 0.001$  vs. control HPFs+IL-6 or CAFs. **B.** Prostraspheres obtained in P1 were photographed and a representative image of each treatments is shown. Results are representative of three others with similar results.
